# Supplementary material for: Development of 6′-N-Acylated Isepamicin Analogs with Improved Antibacterial Activity against Isepamicin-Resistant Pathogens
Source: PubMed Central journal article supplement (PMC7356214; doi:10.3390/biom10060893), 2020-06-11
Supplement: biomolecules-10-00893-s001.pdf [file biomolecules-10-00893-s001.pdf]

## *Supplementary Materials*

# **Development of 6'-N-acylated isepamicin analogs with improved antibacterial activity against isepamicin-resistant pathogens**

**Yeon Hee Ban <sup>1</sup>, Myoung Chong Song <sup>1</sup>, Hee Jin Kim <sup>2</sup>, Heejeong Lee <sup>3</sup>, Jae Bok Wi <sup>4</sup>, Je Won Park <sup>4</sup>, Dong Gun Lee <sup>3</sup>, and Yeo Joon Yoon <sup>1,\*</sup>**

<sup>1</sup> Natural Products Research Institute, College of Pharmacy, Seoul National University, Gwanak-gu, Seoul 08826, Republic of Korea; yhban@snu.ac.kr (Y.H.B.); smch517@snu.ac.kr (M.C.S.)

<sup>2</sup> Department of Chemistry and Nanoscience, Ewha Womans University, Seoul 03760, Republic of Korea; kimijini93@gmail.com (H.J.K.)

<sup>3</sup> School of Life Sciences, BK21 Plus KNU Creative BioResearch Group, College of Natural Sciences, Kyungpook National University, Daehakro 80, Bukgu, Daegu 41566, Republic of Korea; gml09wjd@naver.com (H.L.); dglee222@knu.ac.kr (D.G.L.)

<sup>4</sup> Department of Integrated Biomedical and Life Sciences, Korea University, Seoul 02841, Republic of Korea; slwlwhs@korea.ac.kr (J.B.W.); jewonpark@korea.ac.kr (J.W.P.)

\* Correspondence: yeojoonyoon@snu.ac.kr (Y.J.Y.); Tel.: +82-2-880-2379 (Y.J.Y.)

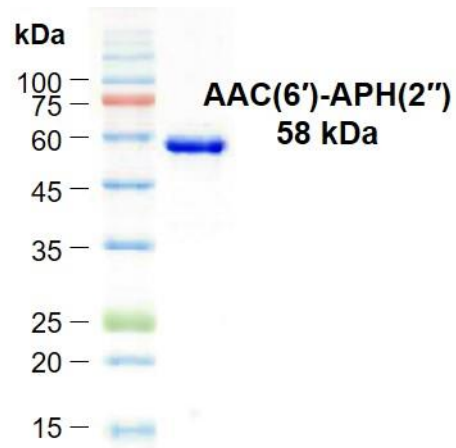

**Figure S1.** Coomassie blue-stained SDS-PAGE gel of purified C-terminal hexahistidine tagged AAC(6')-APH(2'').

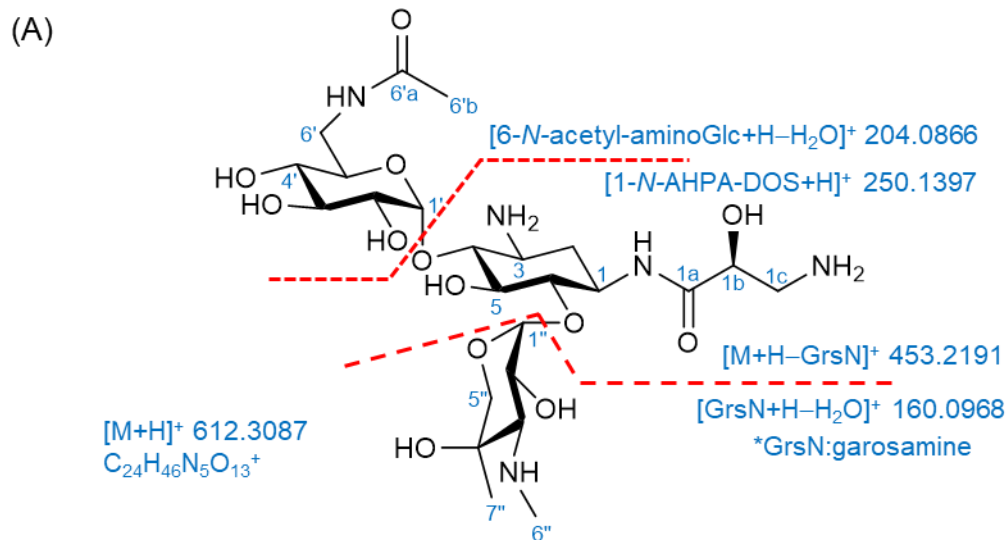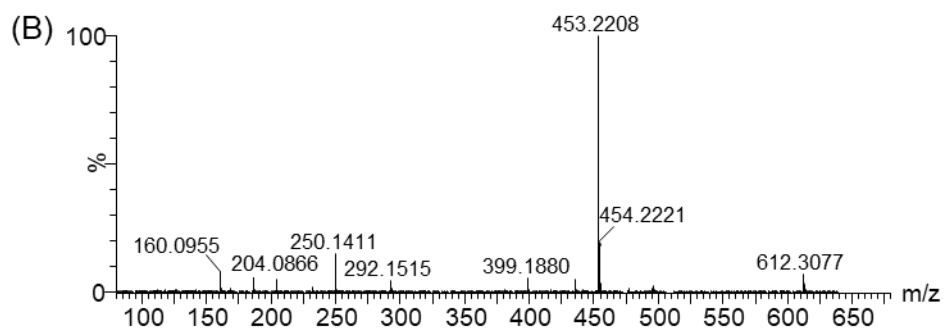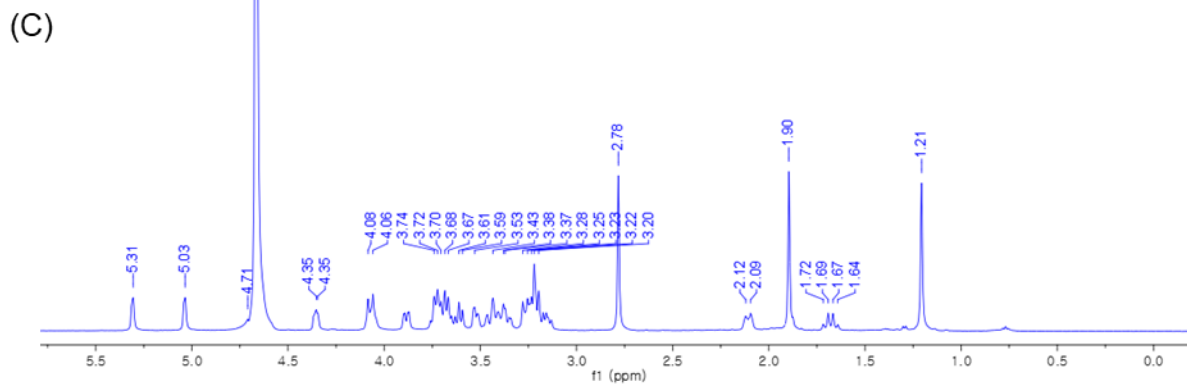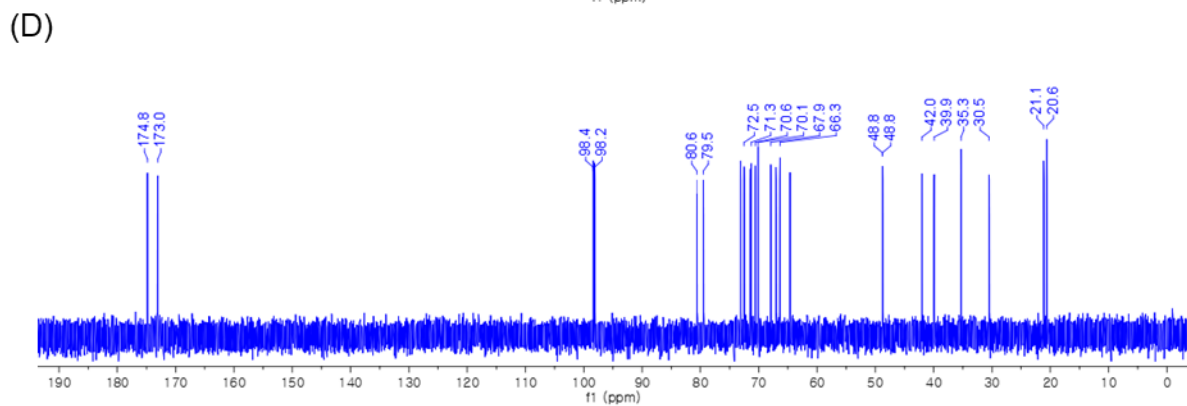

(E)

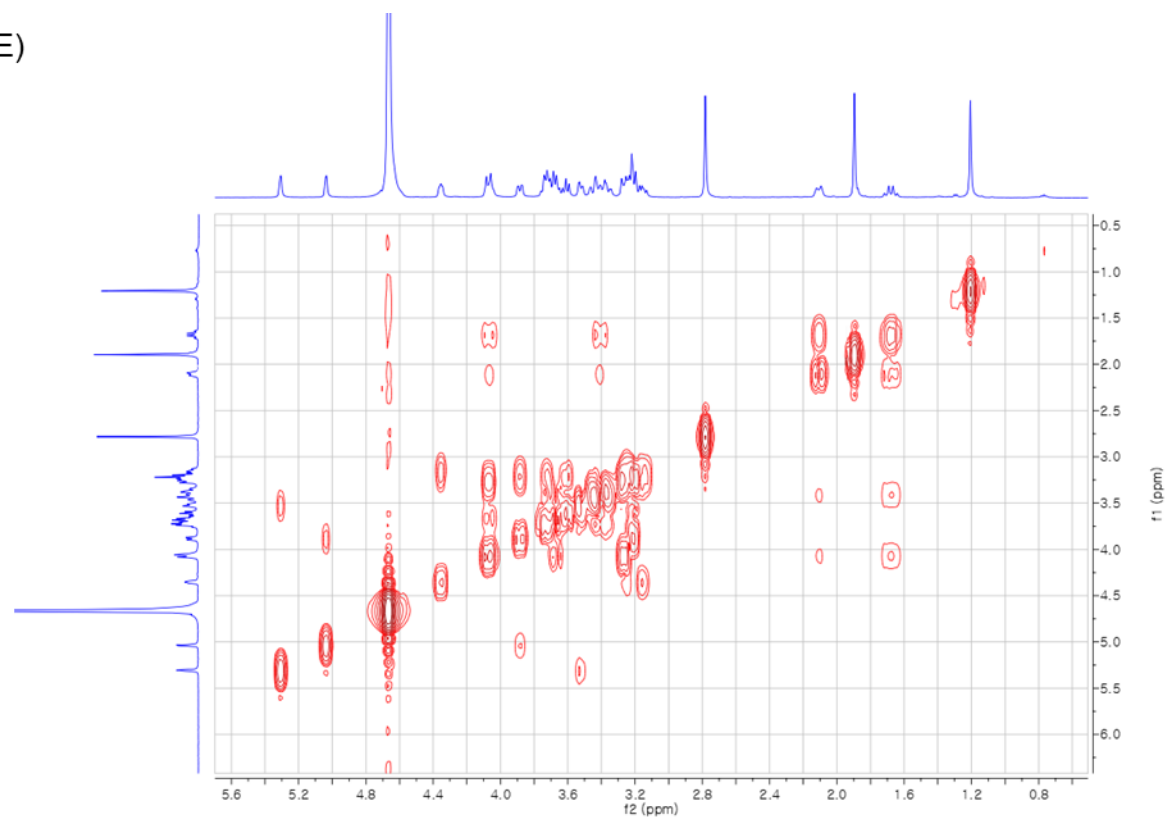

(F)

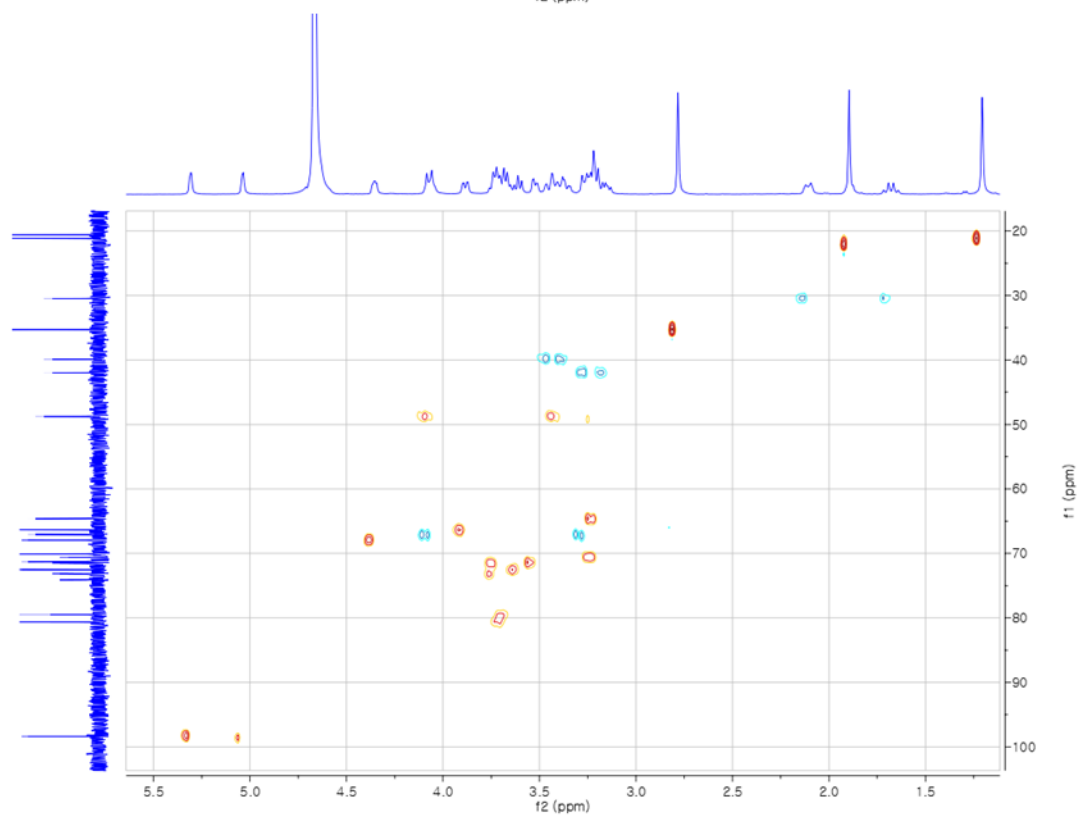

(G)

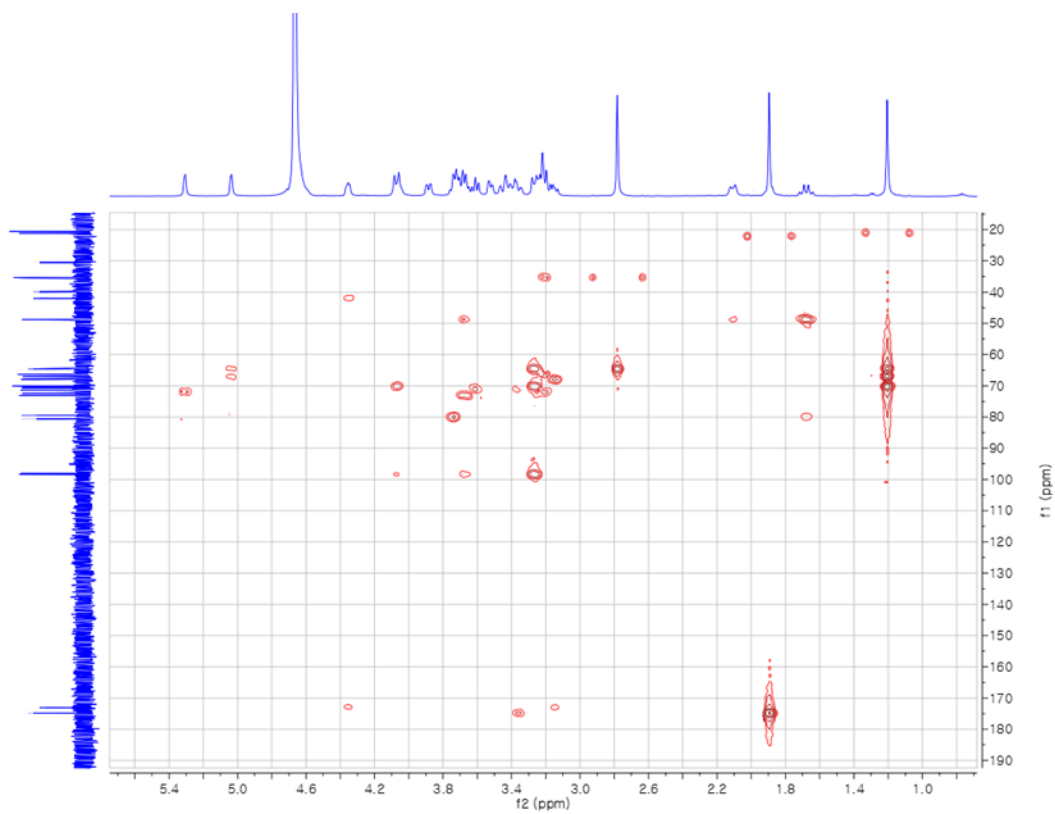

**Figure S2.** The structural determination of 6'-*N*-acetyl isepamicin. (A) MS/MS fragmentation pattern (B) MS/MS spectra (C) <sup>1</sup>H NMR data (D) <sup>13</sup>C NMR data (E) <sup>1</sup>H-<sup>1</sup>H gCOSY NMR data (F) <sup>1</sup>H-<sup>13</sup>C gHSQC NMR data (G) <sup>1</sup>H-<sup>13</sup>C gHMBC NMR data

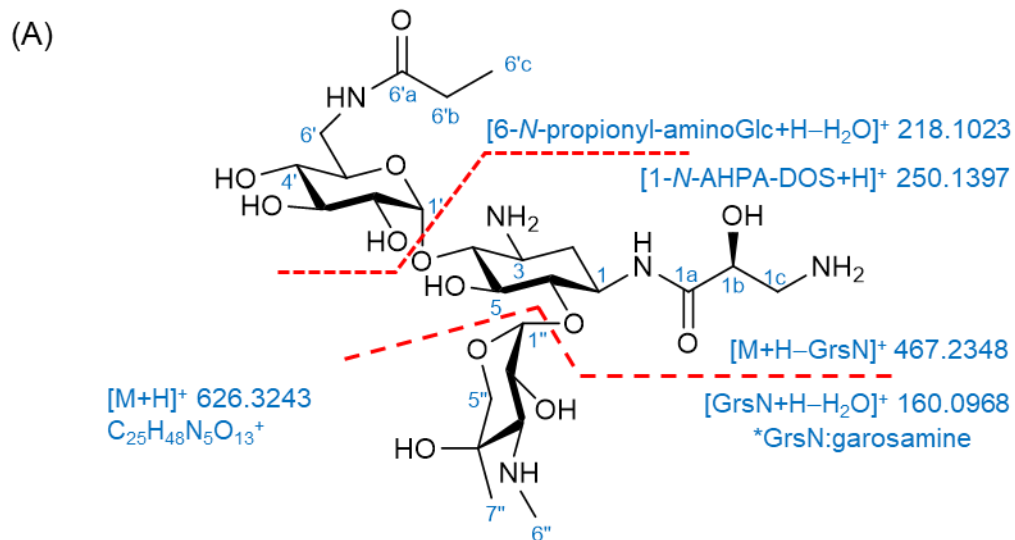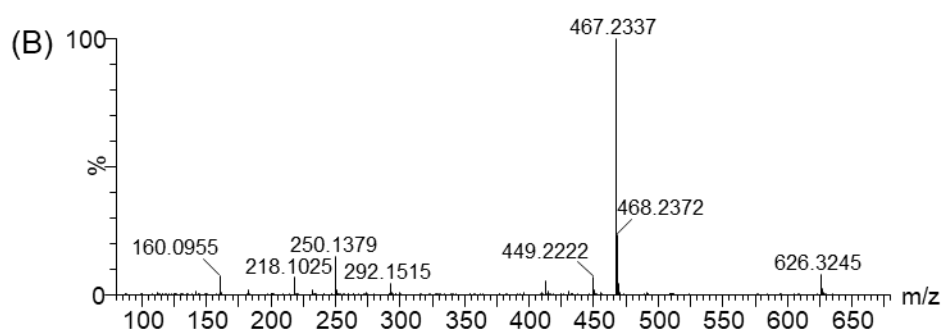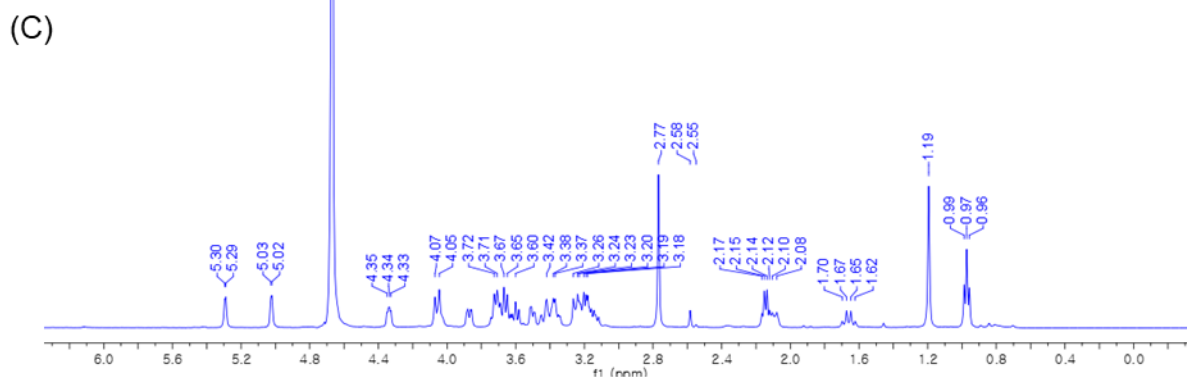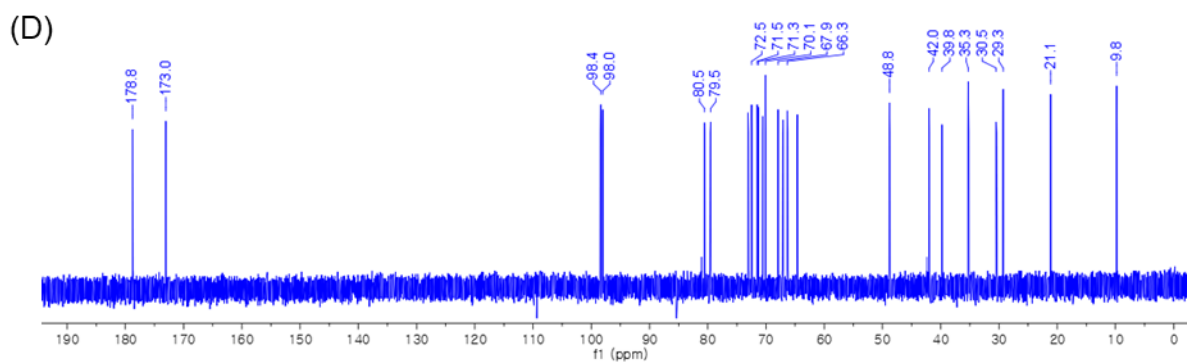

(E)

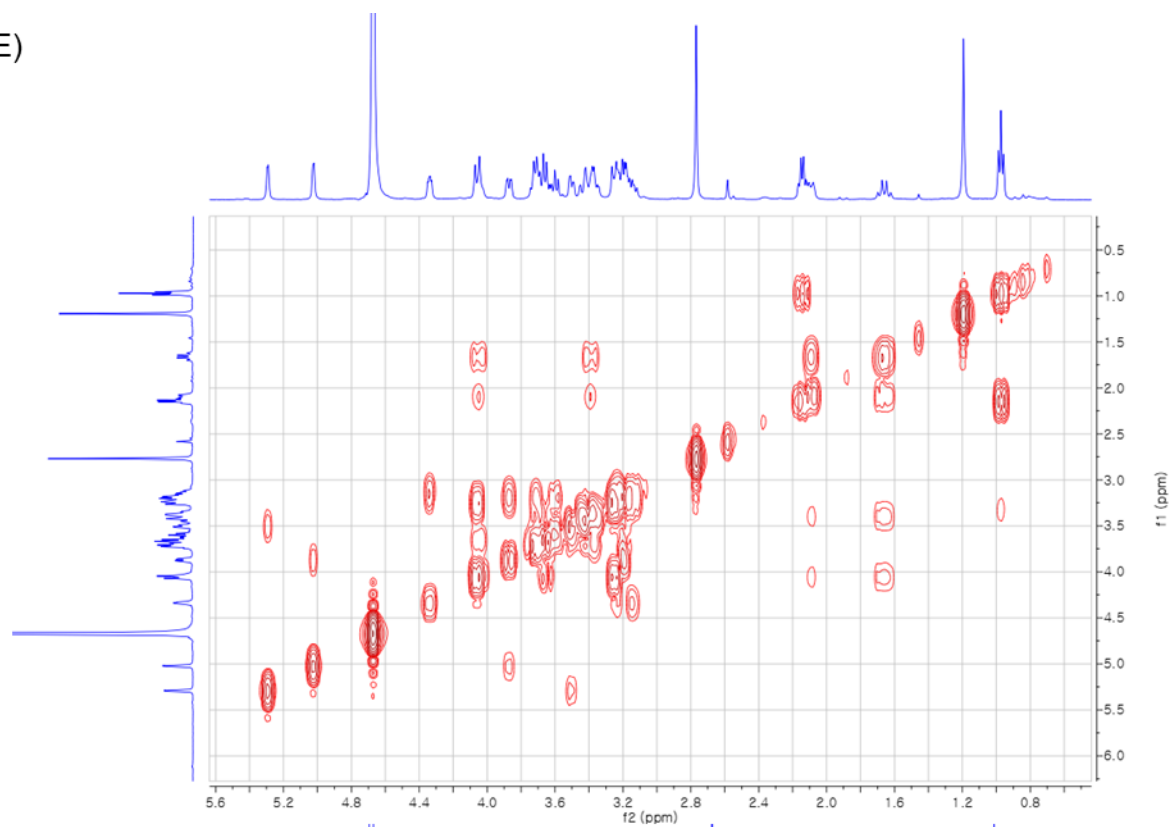

(F)

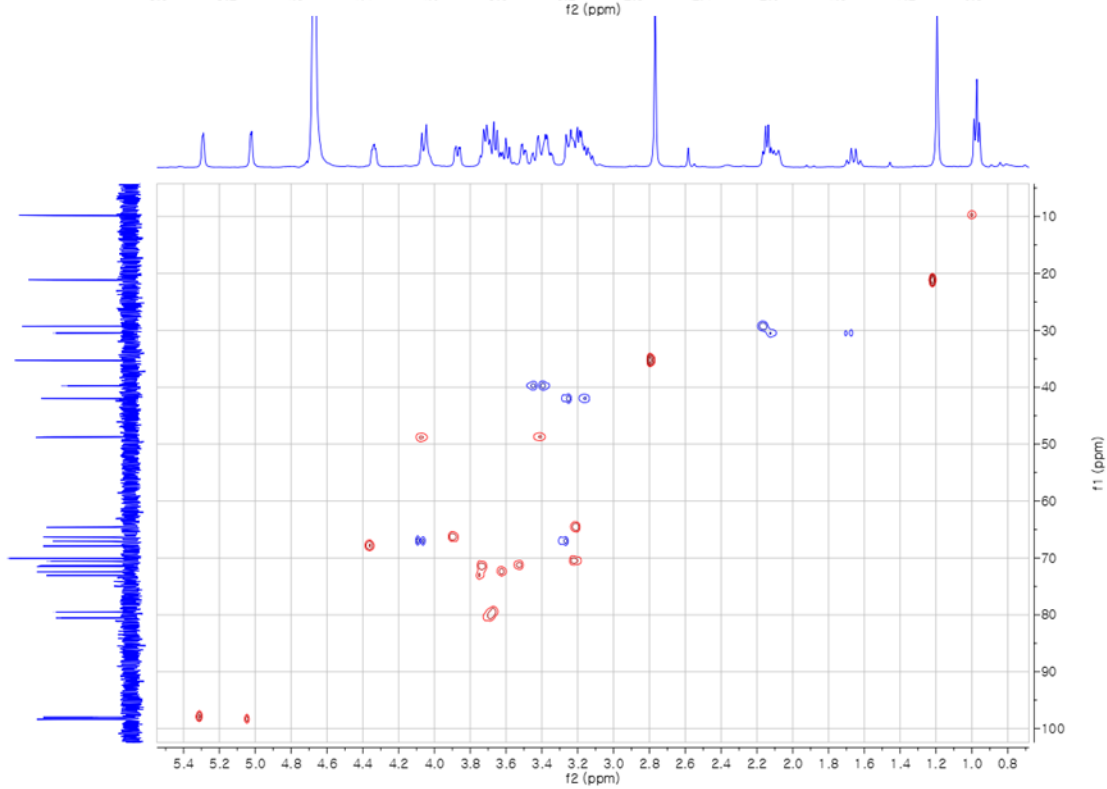

(G)

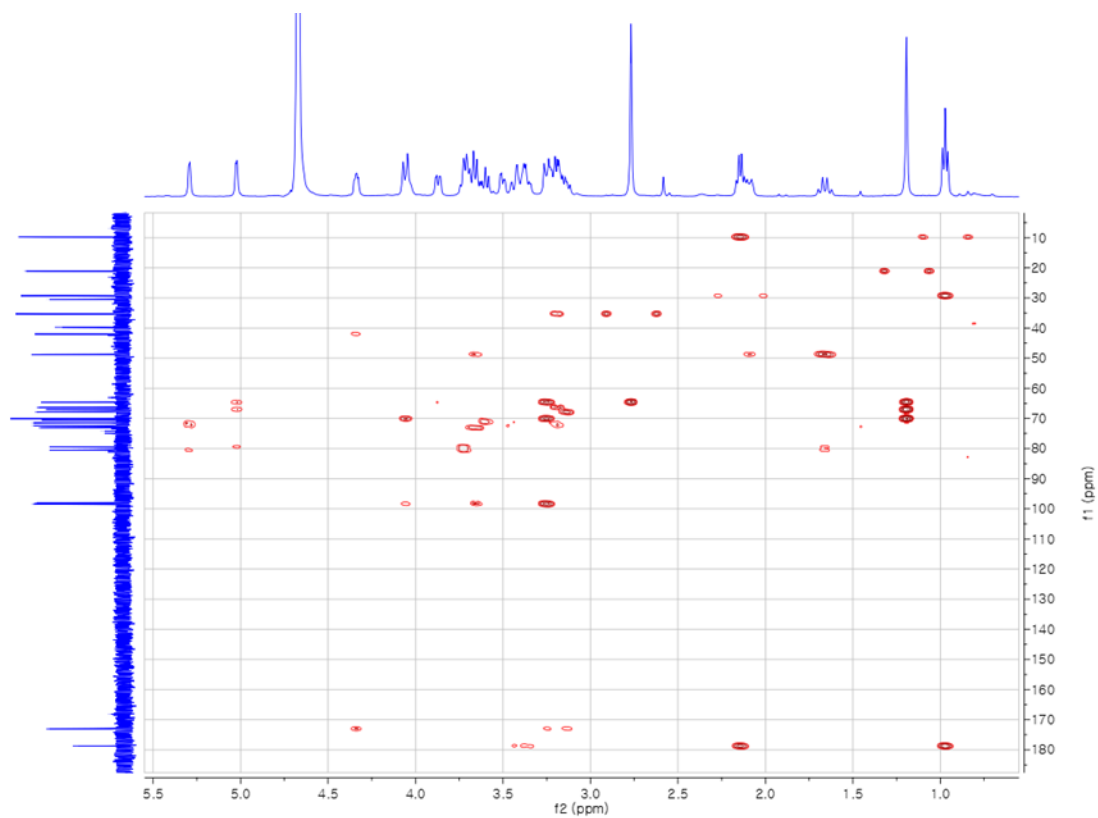

**Figure S3.** The structural determination of 6'-*N*-propionyl isepamicin. (A) MS/MS fragmentation pattern (B) MS/MS spectra (C) <sup>1</sup>H NMR data (D) <sup>13</sup>C NMR data (E) <sup>1</sup>H-<sup>1</sup>H gCOSY NMR data (F) <sup>1</sup>H-<sup>13</sup>C gHSQC NMR data (G) <sup>1</sup>H-<sup>13</sup>C gHMBC NMR data



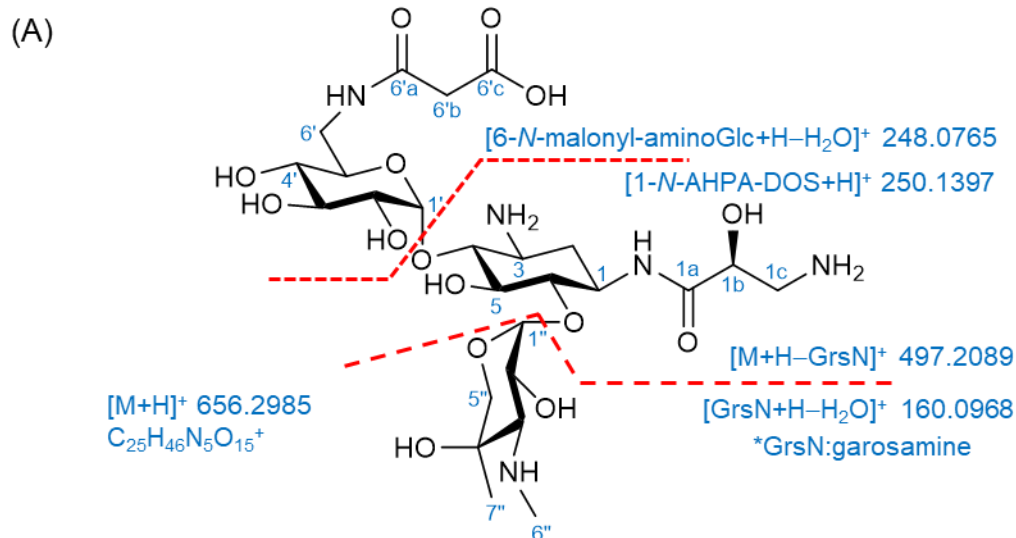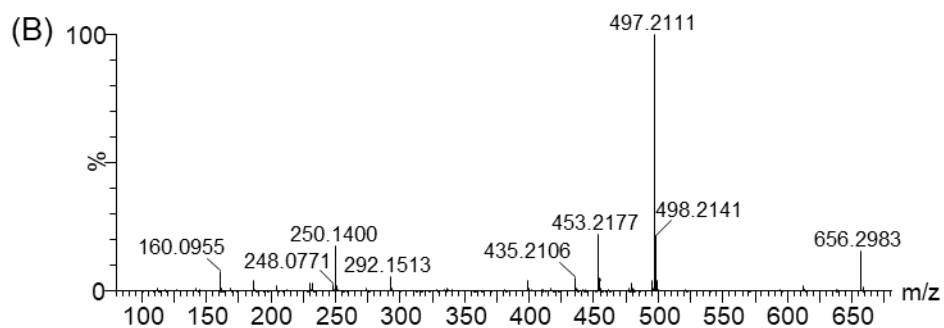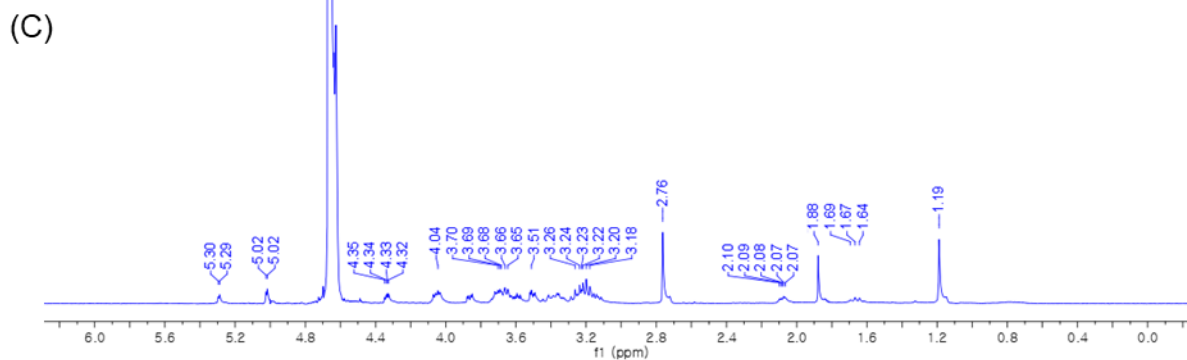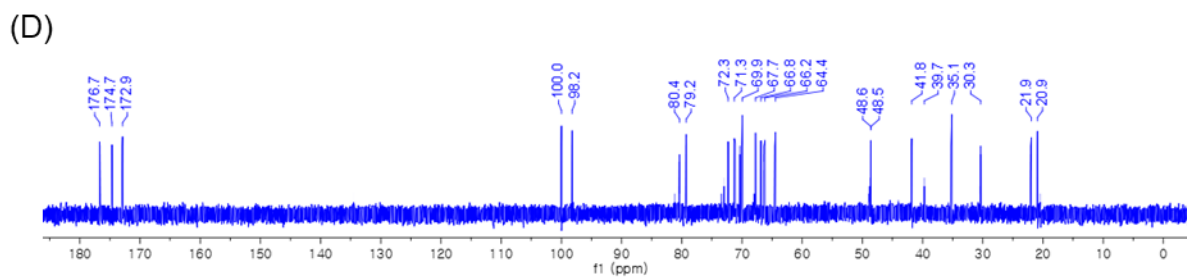

(E)

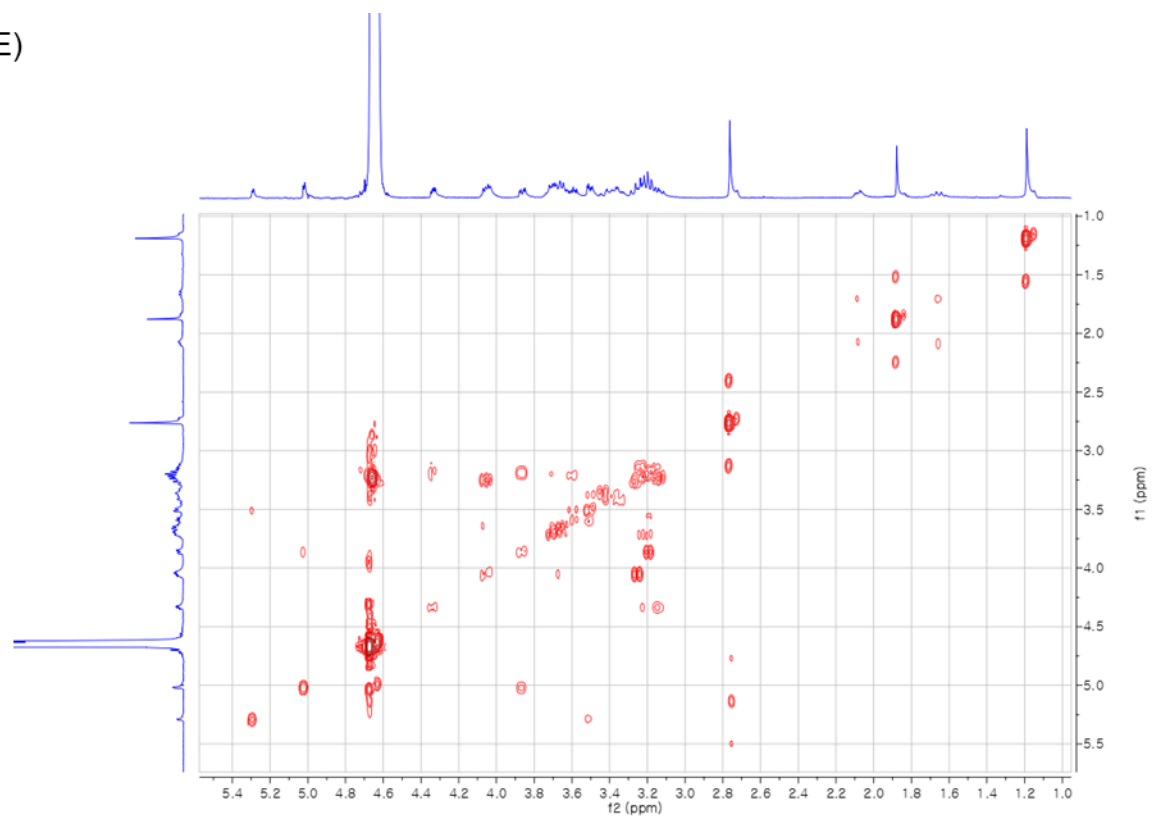

(F)

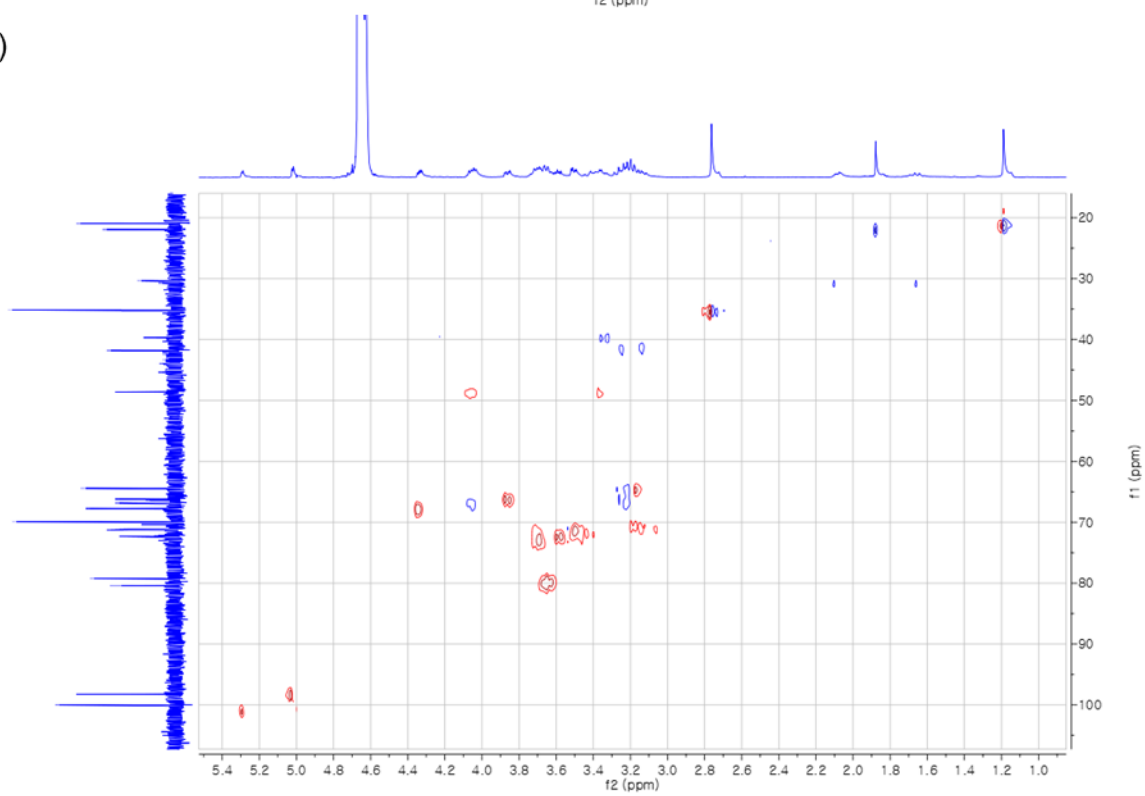

(G)

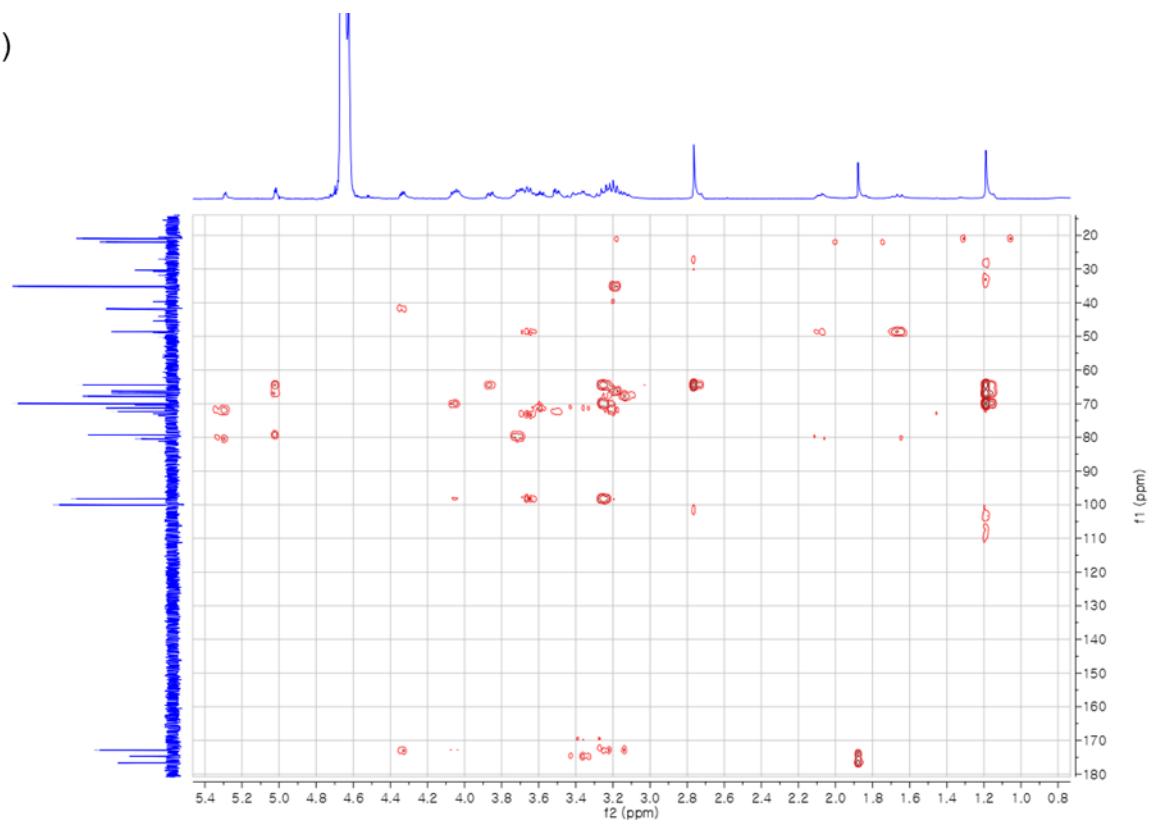

**Figure S4.** The structural determination of 6'-*N*-malonyl isepamicin. (A) MS/MS fragmentation pattern (B) MS/MS spectra (C) <sup>1</sup>H NMR data (D) <sup>13</sup>C NMR data (E) <sup>1</sup>H-<sup>1</sup>H gCOSY NMR data (F) <sup>1</sup>H-<sup>13</sup>C gHSQC NMR data (G) <sup>1</sup>H-<sup>13</sup>C gHMBC NMR data
